# Supplementary material
Source: publisher figshare collection journal article supplement (https://acs.figshare.com/ndownloader/files/5816217)
Supplement: Supplementary file 1 [file 5816217]

Effect of a dispersion of electron transfer rates on steady-state catalytic electron transport in [NiFe]-hydrogenase and other enzymes.

## Supplementary Information

### Derivation of eq 5.

We note  $F_{k_0}(t)$  the (cumulative) distribution function of  $k_0$ , i.e. the probability  $P(k_0 < t)$  that  $k_0$  takes a value lower than  $t$ , and  $f_{k_0}(t)$  the density function of  $k_0$  [that we loosely note  $p(k_0)$  in the main text]. They are related to each other by  $F_{k_0}(t) = \int_0^t f_{k_0}(u)du$ .

$$F_{k_0}(t) = P\left(k_0^{(d=0)} \exp(-\beta d) < t\right) \quad (\text{S1a})$$

$$= 1 - P\left(d < -\frac{1}{\beta} \ln \frac{t}{k_0^{(d=0)}}\right) \quad (\text{S1b})$$

$$= 1 - F_d\left(-\frac{1}{\beta} \ln \frac{t}{k_0^{(d=0)}}\right) \quad (\text{S1c})$$

Differentiation of eq S1c with respect to  $t$  gives:

$$f_{k_0}(t) = \frac{1}{\beta t} f_d\left(-\beta^{-1} \ln \frac{t}{k_0^{(d=0)}}\right) \quad (\text{S2})$$

With

$$f_d\left(-\frac{1}{\beta} \ln \frac{t}{k_0^{(d=0)}}\right) = \begin{cases} 1/d_0 & \text{for } d \in [d_{\min}, d_{\max}] \\ 0 & \text{for any other value} \end{cases} \quad (\text{S3})$$

and  $d_{\max} = d_{\min} + d_0$ , we get eq 5, with  $k_0^{\min} = k_0^{\max} \exp(-\beta d_0)$ :

$$f_{k_0}(t) = \begin{cases} 1/\beta d_0 t & \text{for } t \in [k_0^{\min}, k_0^{\max}] \\ 0 & \text{for any other value} \end{cases} \quad (\text{S4})$$

## Derivation of eq 6, and corresponding equation for a reductive wave.

For oxidative catalysis, the corrected current  $i^*$  is obtained by integrating eq 2 (derived in ref 5) across the distribution of  $k_0$  values (eq 5),  $i^* = \int_{k_0^{\min}}^{k_0^{\max}} i(k_0)p(k_0)dk_0$  with  $k_0^{\min} = k_0^{\max} \exp(-\beta d_0)$ , and so:

$$\frac{i^*}{i_{\text{lim}}} = \int_{k_0^{\min}}^{k_0^{\max}} \frac{1}{1 + e_{\text{O/I}}^{-1} \left(1 + e_{\text{I/R}}^{-1}\right) + \frac{k_2}{u} \left\{ e_{\text{I/R}}^{-1/2} + e_{\text{O/I}}^{-1/2} \left(1 + e_{\text{I/R}}^{-1}\right) \right\}} \frac{(\beta d_0)^{-1}}{u} du \quad (\text{S5})$$

Changing variables, we let

$$v^{\text{ox}} = \frac{k_2}{u} \left\{ e_{\text{I/R}}^{-1/2} + e_{\text{O/I}}^{-1/2} \left(1 + e_{\text{I/R}}^{-1}\right) \right\} \quad (\text{S6})$$

so that

$$\frac{i^*}{i_{\text{lim}}} = -\frac{1}{\beta d_0} \int_{v_1^{\text{ox}}}^{v_2^{\text{ox}}} \frac{1}{a^{\text{ox}} + v^{\text{ox}}} \frac{1}{v^{\text{ox}}} dv^{\text{ox}} \quad (\text{S7a})$$

$$v_2^{\text{ox}} = \frac{k_2}{k_0^{\max}} \left\{ e_{\text{I/R}}^{-1/2} + e_{\text{O/I}}^{-1/2} \left(1 + e_{\text{I/R}}^{-1}\right) \right\} \quad (\text{S7b})$$

$$v_1^{\text{ox}} = v_2^{\text{ox}} \exp(\beta d_0) \quad (\text{S7c})$$

with  $a^{\text{ox}}$  given by eq 6b. Integration, using  $\int (a + v)^{-1} v^{-1} dv = a^{-1} [\ln(v) - \ln(a + v)]$ , gives

$$\frac{i^*}{i_{\text{lim}}} = \frac{1}{\beta d_0} \frac{1}{a^{\text{ox}}} \left[ -\ln v + \ln(a^{\text{ox}} + v) \right]_{v_2^{\text{ox}} \exp(\beta d_0)}^{v_2^{\text{ox}}} \quad (\text{S8a})$$

$$= \frac{1}{\beta d_0} \frac{1}{a^{\text{ox}}} \left( \beta d_0 + \ln \frac{a^{\text{ox}} + v_2^{\text{ox}}}{a^{\text{ox}} + v_2^{\text{ox}} \exp(\beta d_0)} \right) \quad (\text{S8b})$$

This is equivalent to eq 6 with  $v_2^{\text{ox}} \equiv b_2^{\text{ox}}$ .

When  $k_2/k_0^{\max}$ , and thus  $b_2$ , tends to zero,  $i^*/i_{\text{lim}}$  tends to  $1/a^{\text{ox}}$  and the reversible limit is recovered. When  $\beta d_0$  tends to zero,  $i^*/i_{\text{lim}}$  tends to  $(a^{\text{ox}} + b_2^{\text{ox}})^{-1}$  and the dispersion of ET rates is negligible.

---

<sup>i</sup>This can be obtained from eq 6a with  $\exp(\epsilon) \approx 1 + \epsilon$  and  $\ln(1 + \epsilon) \approx \epsilon$ , so that

$$\ln \frac{a + b_2}{a + b_2 \exp(\epsilon)} \approx -\ln \frac{a + b_2(1 + \epsilon)}{a + b_2} \approx -\ln \left( 1 + \frac{b_2}{1 + b_2} \epsilon \right) \approx -\frac{b_2}{1 + b_2} \epsilon \quad \text{and} \quad \frac{1}{a} \left( 1 - \frac{b_2}{1 + b_2} \right) = \frac{1}{a + b_2}$$

For reductive catalysis, the ideal current equation is:<sup>5</sup>

$$i_{\text{lim}}/i - 1 = e_{\text{I/R}} (1 + e_{\text{O/I}}) + \frac{k_2}{k_0} \left\{ e_{\text{O/I}}^{1/2} + e_{\text{I/R}}^{1/2} (1 + e_{\text{O/I}}) \right\} \quad (\text{S9})$$

and once integrated over the values of  $k_0$ , the corrected current equation reads as eqs 6a and 8 but with

$$a^{\text{red}} = 1 + e_{\text{I/R}}(1 + e_{\text{O/I}}) \quad (\text{S10a})$$

$$b_2^{\text{red}} = (k_2/k_0^{\text{max}}) \left( e_{\text{O/I}}^{1/2} + e_{\text{I/R}}^{1/2}(1 + e_{\text{O/I}}) \right) \quad (\text{S10b})$$
